# Supplementary material
Source: PubMed Central journal article supplement (PMC3488063)
Supplement: supp_M112.378299_jbc.M112.378299-1.pdf [file supp_M112.378299_jbc.M112.378299-1.pdf]

**FIGURE S1. NAC and MPG reduce DCF-detectable ROS levels in human NSCLC cell lines.** A549 cells were treated for 16 hours with nothing (red), NAC (teal), or MPG (orange). Following incubation cells were stained with H<sub>2</sub>DCF-DA and analyzed by flow cytometry. The left panel shows a histogram overlay, while the right panels show the individual histograms with an arbitrary gate representing the percentage of cells with DCF-detected ROS.

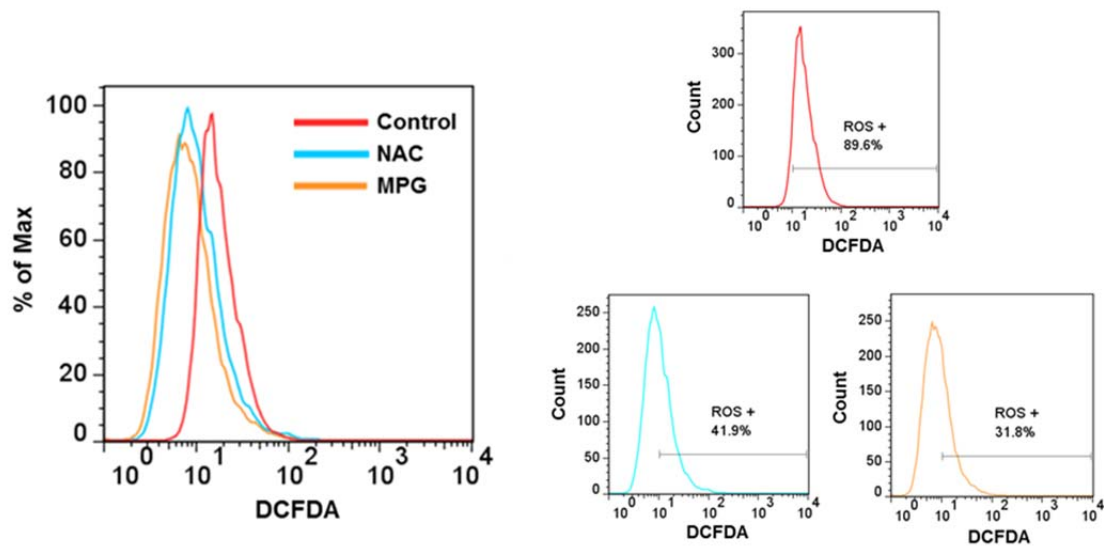

**Brock *et al.* - Figure S1**
